# Supplementary material for: Donor polymer fluorination doubles the efficiency in non-fullerene organic photovoltaics
Source: Royal Society of Chemistry journal article supplement (doi:10.1039/c7ta07882j), 2017-01-01
Supplement: c7ta07882j1.pdf [file c7ta07882j1.pdf]

## Supporting Information

for

### Donor Polymer Fluorination Doubles the Efficiency in Non-Fullerene Organic Photovoltaics

*Nicole Bauer<sup>a</sup>, Qianqian Zhang<sup>a</sup>, Jingshuai Zhu<sup>b</sup>, Zhengxing Peng<sup>c</sup>, Liang Yan<sup>a</sup>, Chenhui Zhu<sup>d</sup>,  
Harald Ade<sup>c</sup>, Xiaowei Zhan<sup>b</sup>, and Wei You<sup>a,\*</sup>*

<sup>a</sup> Department of Chemistry, University of North Carolina at Chapel Hill, Chapel Hill, North Carolina 27599, USA

<sup>b</sup> Department of Materials Science and Engineering, College of Engineering, Key Laboratory of Polymer Chemistry and Physics of Ministry Education, Peking University, Beijing 100871, China

<sup>c</sup> Department of Physics and ORaCEL, North Carolina State University, Raleigh, North Carolina 27695, USA

<sup>d</sup> Advanced Light Source, Lawrence Berkeley National Laboratory, Berkeley, California 94720, USA

\* corresponding author: [wyou@unc.edu](mailto:wyou@unc.edu)

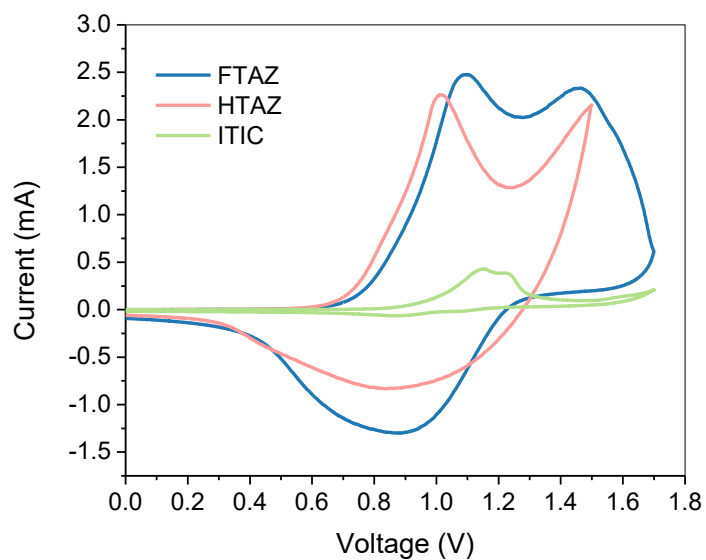

**Figure S1.** Cyclic voltammograms for FTAZ, HTAZ, and ITIC

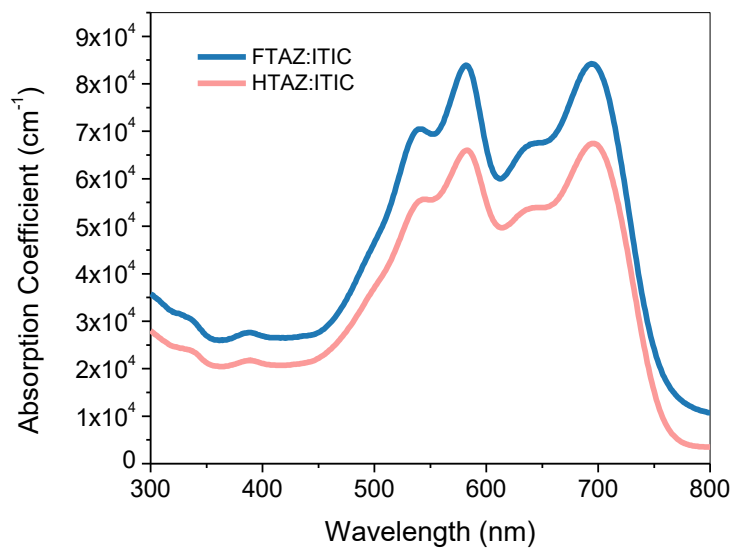

**Figure S2.** Absorption coefficient of FTAZ:ITIC and HTAZ:ITIC thin films

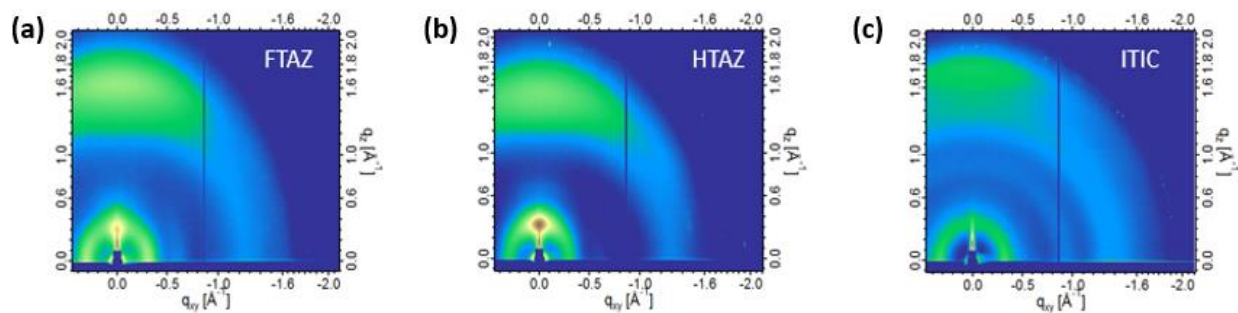

**Figure S3.** 2D GIWAXS pattern of neat FTAZ, HTAZ, and ITIC films

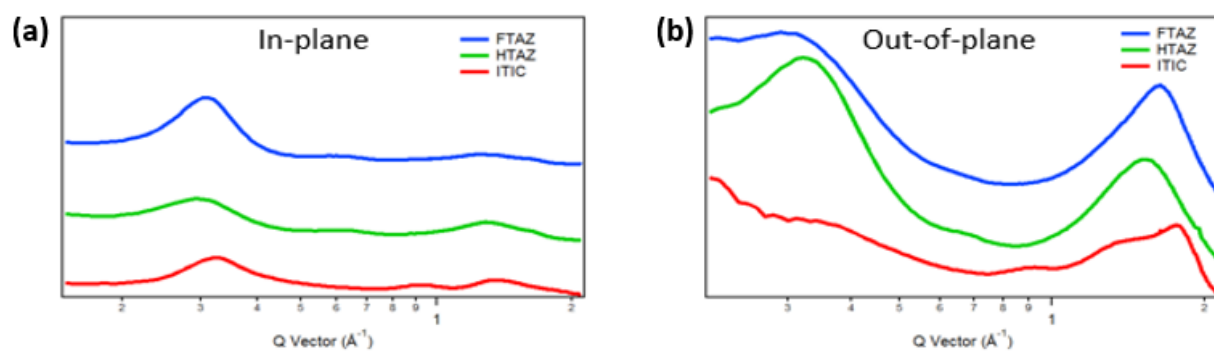

**Figure S4.** 1D line scans for neat FTAZ, HTAZ, and ITIC films

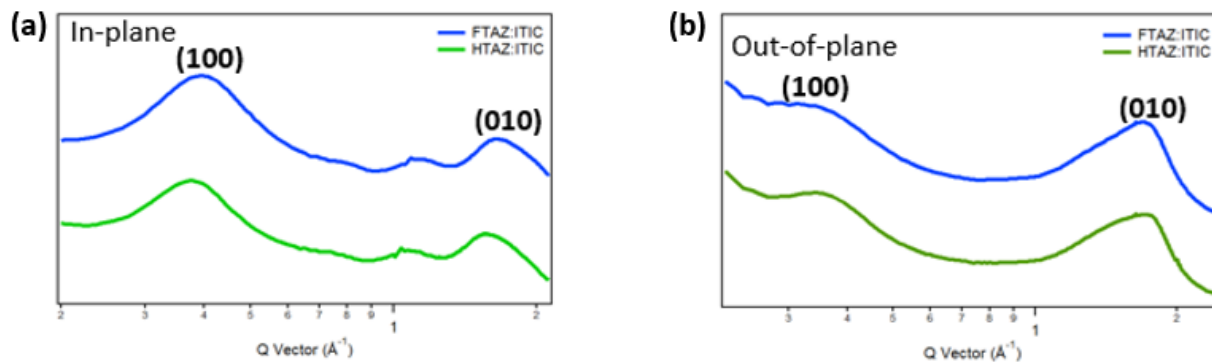

**Figure S5.** 1D line scans for FTAZ:ITIC and HTAZ:ITIC blend films

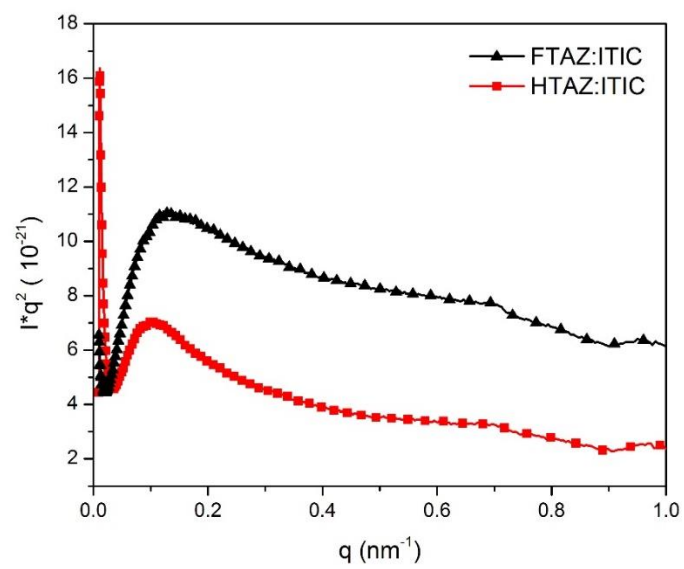

**Figure S6** Lorentz-corrected RSoXS profiles of FTAZ:ITIC and HTAZ:ITIC blend films
